# Supplementary material
Source: PubMed Central journal article supplement (PMC4197123)
Supplement: NIHMS591414-supplement-Table_S.pdf [file NIHMS591414-supplement-Table_S.pdf]

Table S2. The frequency of PIN and cancer in mouse prostates

| <b>Strain</b>                | <b>Age</b>  | <b>#Mice</b> | <b>Phenotype</b>                          |
|------------------------------|-------------|--------------|-------------------------------------------|
| $\delta$ -Cat <sup>-/-</sup> | ≤ 6 weeks   | 3            | 3/3 normal                                |
|                              | ≤ 3 months  | 2            | 2/2 normal                                |
|                              | ≥ 6 months  | 2            | 2/2 normal                                |
|                              | ≥ 11 months | 2            | 2/2 normal                                |
| No Myc/ $\delta^{+/+}$       | ≤ 6 weeks   | 4            | 4/4 normal                                |
|                              | ≥ 6 months  | 3            | 3/3 normal                                |
| Myc/ $\delta^{+/+}$          | ≤ 4 weeks   | 5            | 5/5 epithelial hyperplasia                |
|                              | ≤ 6 weeks   | 5            | 5/5 low grade mPIN                        |
|                              | ≥ 6 months  | 5            | 5/5 cribriform mPIN                       |
|                              | ≥ 8 months  | 3            | 1/3 invasive cancer<br>2/3 cribriform PIN |
| Myc/ $\delta^{-/-}$          | ≤ 6 weeks   | 3            | 3/3 cribriform mPIN                       |
|                              | ≥ 6 months  | 5            | 5/5 cribriform mPIN                       |
|                              | ≥ 8 months  | 3            | 3/3 invasive cancer                       |
| Myc/ $\delta^{-/-}$          | ≤ 6 weeks   | 4            | 4/4 cribriform mPIN                       |
|                              | ≥ 6 months  | 3            | 3/3 invasive cancer                       |
|                              | ≥ 8 months  | 3            | 3/3 invasive cancer                       |
